# Supplementary material for: Kinematic changes of the trunk and lower limbs during voluntary lateral sway postural control in adults with low back pain
Source: PubMed Central journal article supplement (PMC10927732; doi:10.3389/fbioe.2024.1351913), 2024-02-27
Supplement: DataSheet1.pdf [file DataSheet1.pdf]

**Table S1 Differences in the standard deviation of range of motion of spine, pelvis, and lower limb joints between the low back pain group and the control group (median [25th percentile, 75th percentile] <sup>a</sup>, unit: degree)**

|                                                                             | Low Back Pain Group<br>(n=13) | Control Group<br>(n=14) | p             | Effect Size (r) | Power (1-β) |
|-----------------------------------------------------------------------------|-------------------------------|-------------------------|---------------|-----------------|-------------|
| <b>Spine - Standard Deviation of Range of Motion</b>                        |                               |                         |               |                 |             |
| Sagittal Plane                                                              | 0.67 [0.54, 0.85]             | 0.72 [0.64, 1.19]       | 0.244         | -0.224          | 0.354       |
| Coronal Plane                                                               | 0.97 [0.63, 1.75]             | 1.06 [0.81, 1.69]       | 0.593         | -0.103          | 0.612       |
| Transverse Plane                                                            | 0.77 [0.60, 1.04]             | 0.84 [0.70, 1.13]       | 0.497         | -0.131          | 0.533       |
| <b>Pelvis - Standard Deviation of Range of Motion</b>                       |                               |                         |               |                 |             |
| Sagittal Plane                                                              | 0.44 [0.31, 0.70]             | 0.59 [0.42, 0.67]       | 0.332         | -0.187          | 0.412       |
| Coronal Plane                                                               | 0.54 [0.37, 0.72]             | 0.62 [0.47, 0.75]       | 0.332         | -0.187          | 0.412       |
| Transverse Plane                                                            | 0.94 [0.83, 1.28]             | 0.90 [0.69, 1.11]       | 0.244         | 0.224           | 0.354       |
| <b>Ipsilateral <sup>b</sup> Hip - Standard Deviation of Range of Motion</b> |                               |                         |               |                 |             |
| Sagittal Plane                                                              | 0.79 [0.43, 1.04]             | 1.02 [0.73, 1.78]       | 0.120         | -0.299          | 0.274       |
| Coronal Plane                                                               | 1.19 [0.78, 1.54]             | 1.76 [1.19, 1.98]       | <b>0.020*</b> | -0.448          | 0.171       |
| Transverse Plane                                                            | 1.17 [0.95, 1.52]             | 2.16 [1.54, 3.09]       | <b>0.003*</b> | -0.570          | 0.104       |
| <b>Contralateral Hip - Standard Deviation of Range of Motion</b>            |                               |                         |               |                 |             |
| Sagittal Plane                                                              | 0.63 [0.51, 0.97]             | 0.54 [0.48, 0.62]       | 0.145         | 0.280           | 0.291       |
| Coronal Plane                                                               | 1.12 [0.90, 1.56]             | 1.10 [0.74, 1.60]       | 0.528         | 0.121           | 0.557       |
| Transverse Plane                                                            | 1.07 [0.82, 1.33]             | 0.78 [0.67, 1.41]       | 0.357         | 0.177           | 0.428       |
| <b>Ipsilateral Knee - Standard Deviation of Range of Motion</b>             |                               |                         |               |                 |             |
| Sagittal Plane                                                              | 1.15 [0.84, 1.46]             | 1.29 [0.90, 2.19]       | 0.308         | -0.196          | 0.395       |
| Coronal Plane                                                               | 0.78 [0.56, 1.33]             | 1.14 [0.71, 2.33]       | 0.207         | -0.243          | 0.331       |
| Transverse Plane                                                            | 1.71 [1.33, 2.47]             | 2.16 [1.66, 4.30]       | 0.099         | -0.318          | 0.260       |
| <b>Contralateral Knee - Standard Deviation of Range of Motion</b>           |                               |                         |               |                 |             |
| Sagittal Plane                                                              | 0.89 [0.69, 1.20]             | 0.65 [0.41, 0.80]       | <b>0.020*</b> | 0.448           | 0.171       |
| Coronal Plane                                                               | 0.56 [0.44, 0.73]             | 0.52 [0.36, 0.69]       | 0.808         | 0.047           | 0.810       |
| Transverse Plane                                                            | 1.08 [0.89, 1.35]             | 1.08 [0.68, 1.48]       | 0.662         | 0.084           | 0.673       |
| <b>Ipsilateral Ankle - Standard Deviation of Range of Motion</b>            |                               |                         |               |                 |             |
| Sagittal Plane                                                              | 0.66 [0.44, 1.04]             | 0.67 [0.48, 1.45]       | 0.698         | -0.075          | 0.706       |
| Coronal Plane                                                               | 1.16 [0.97, 1.67]             | 1.38 [1.03, 1.66]       | 0.332         | -0.187          | 0.412       |
| <b>Contralateral Ankle - Standard Deviation of Range of Motion</b>          |                               |                         |               |                 |             |
| Sagittal Plane                                                              | 0.52 [0.40, 0.73]             | 0.47 [0.40, 0.62]       | 0.528         | 0.121           | 0.557       |
| Coronal Plane                                                               | 1.30 [1.13, 1.77]             | 1.50 [1.15, 1.67]       | 0.593         | -0.103          | 0.612       |

Note:

a. Mann-Whitney U test was used to compare the differences between the low back pain group and the control group due to non-normality.

b. The ipsilateral side is the weight shifting towards side (dominant side).

\*: Significant difference between groups at 0.05 level

**Table S2 The differences in the standard deviation of range of motion of the hip, knee, and ankle joints between the ipsilateral side and contralateral side in the low back pain group (n=13) <sup>a, b</sup>**

| Variation             | p     | Effect Size | Power (1- $\beta$ ) |
|-----------------------|-------|-------------|---------------------|
| Hip-Sagittal Plane    | 0.422 | 0.223       | 0.735               |
| Hip-Coronal Plane     | 0.463 | -0.204      | 0.726               |
| Hip-Transverse Plane  | 0.221 | 0.339       | 0.809               |
| Knee-Sagittal Plane   | 0.249 | 0.320       | 0.797               |
| Knee-Coronal Plane    | 0.046 | 0.552       | 0.913               |
| Knee-Transverse Plane | 0.133 | 0.417       | 0.856               |
| Ankle-Sagittal Plane  | 0.173 | 0.378       | 0.834               |
| Ankle-Coronal Plane   | 0.463 | -0.204      | 0.726               |

Note:

a. Wilcoxon test was used to compare the differences between the ipsilateral and contralateral sides due to non-normality.

b. Bonferroni's corrected significance level of 0.025 due to multiple comparisons.

# Significant difference at 0.025 level

**Table S3 The differences in the standard deviation of the range of motion of the hip, knee, and ankle joints between the ipsilateral side and contralateral side in the control group (n=14) <sup>a, b</sup>**

| Variation             | p                        | Effect Size | Power (1- $\beta$ ) |
|-----------------------|--------------------------|-------------|---------------------|
| Hip-Sagittal Plane    | <b>0.003<sup>#</sup></b> | 0.797       | 0.972               |
| Hip-Coronal Plane     | <b>0.009<sup>#</sup></b> | 0.696       | 0.956               |
| Hip-Transverse Plane  | <b>0.002<sup>#</sup></b> | 0.847       | 0.981               |
| Knee-Sagittal Plane   | <b>0.002<sup>#</sup></b> | 0.830       | 0.976               |
| Knee-Coronal Plane    | <b>0.004<sup>#</sup></b> | 0.780       | 0.972               |
| Knee-Transverse Plane | <b>0.004<sup>#</sup></b> | 0.780       | 0.972               |
| Ankle-Sagittal Plane  | 0.074                    | 0.478       | 0.894               |
| Ankle-Coronal Plane   | 0.397                    | -0.226      | 0.740               |

Note:

a. Wilcoxon test was used to compare the differences between the ipsilateral and contralateral sides due to non-normality.

b. Bonferroni's corrected significance level of 0.025 due to multiple comparisons.

# Significant difference at 0.025 level
